# Supplementary material for: Contrasting responses of soil bacterial and fungal networks to photovoltaic power station
Source: PubMed Central journal article supplement (PMC11669257; doi:10.3389/fmicb.2024.1494681), 2024-12-11
Supplement: Table_1.pdf [file Table_1.pdf]

**Table S1** PERMANOVA analysis of microbial communities (weighted UniFrac) in different sites

| Site            | Bacteria |                       |              | Fungi    |                       |              |
|-----------------|----------|-----------------------|--------------|----------|-----------------------|--------------|
|                 | <i>F</i> | <i>R</i> <sup>2</sup> | <i>P</i>     | <i>F</i> | <i>R</i> <sup>2</sup> | <i>P</i>     |
| Control vs Down | 5.05     | 0.17                  | <b>0.003</b> | 2.85     | 0.11                  | <b>0.002</b> |
| Control vs Mid  | 3.83     | 0.13                  | <b>0.005</b> | 1.46     | 0.08                  | <b>0.002</b> |
| Down vs Mid     | 2.04     | 0.06                  | <b>0.02</b>  | 2.61     | 0.06                  | 0.07         |

Statistically significant difference ( $P < 0.05$ ) is represented in bold
